# Supplementary material for: A cargo model of yolk syncytial nuclear migration during zebrafish epiboly
Source: Oxford University Press journal article supplement (doi:10.1242/dev.169664), 2018-01-01
Supplement: dev169664supp.pdf [file dev169664supp.pdf]

## Movies

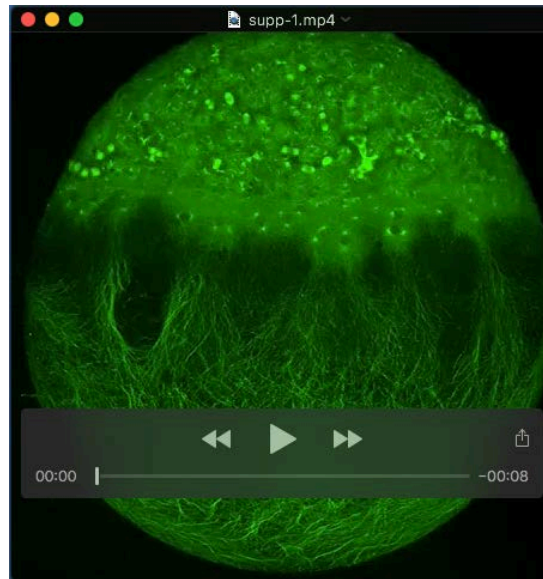

### Movie 1

Confocal time-lapse movie of Tg(XIEef1a1:dclk2DeltaK-GFP) embryo from sphere stage to 80% epiboly. Lateral view with the animal pole to the top.

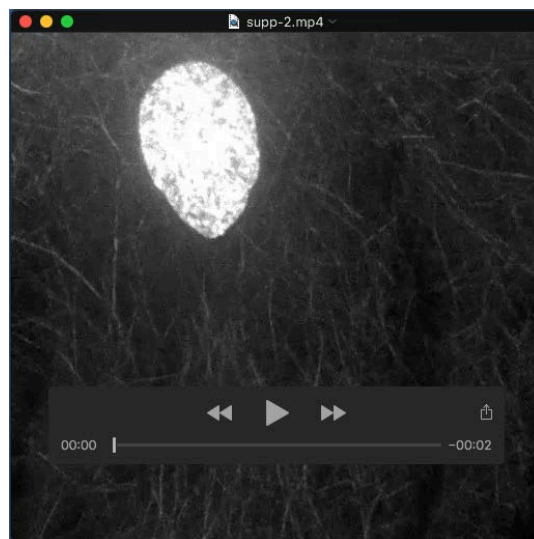

### Movie 2

Spinning disk confocal time-lapse movie of Tg(XIEef1a1:eGFP-tub $\alpha$ 81) embryo with H2A-GFP labeled e-YSN. Lateral view with animal pole towards the top.

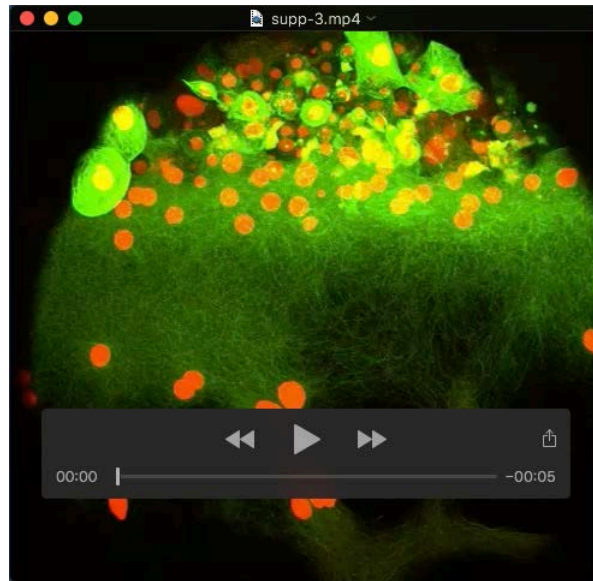

### Movie 3

Confocal time-lapse movie of embryo expressing *Rassf1* in the YSL, nuclei labeled with H2B-RFP and microtubules with GFP-Dcx. Lateral view with animal pole towards the top.

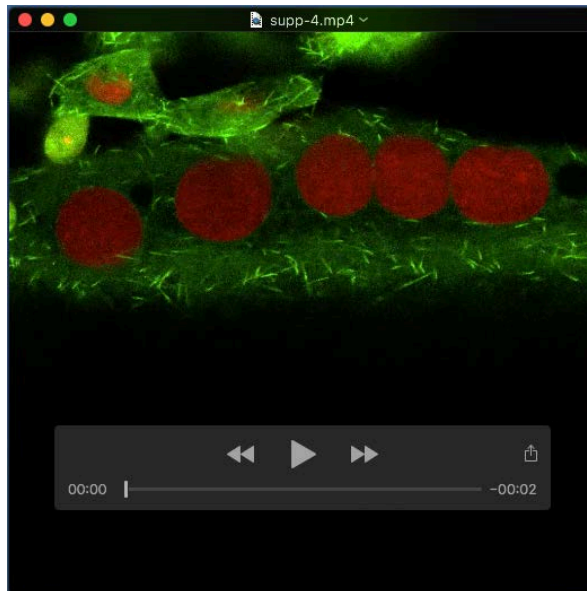

### Movie 4

Confocal time-lapse movie of YSL of embryo expressing H2B-RFP and EB3-GFP, lateral view animal pole to the top. e-YSN represent population that does not migrate along the microtubules. Laterally moving bi-directional EB3-GFP comets visible.

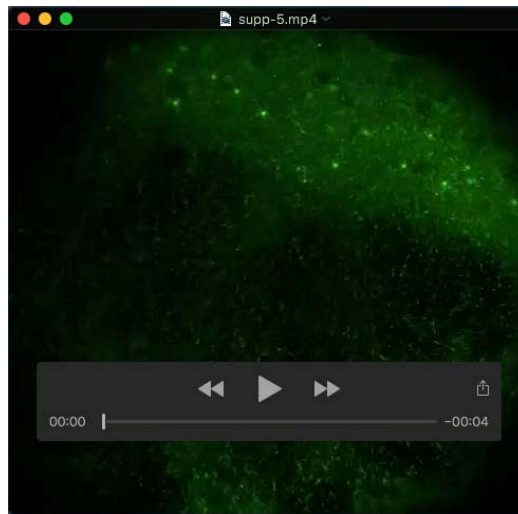

**Movie 5**

Confocal time-lapse movie of embryo expressing EB3-GFP. Lateral view with animal pole to the top right.

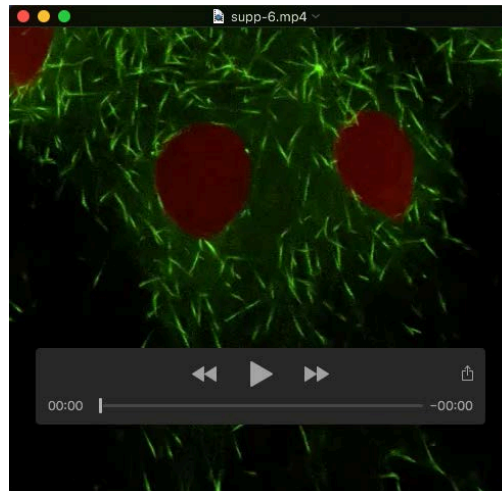

**Movie 6**

Confocal time-lapse movie of embryo expressing H2B-RFP and GFP-Dcx. Two labeled e-YSN can be seen to migrate vegetally.

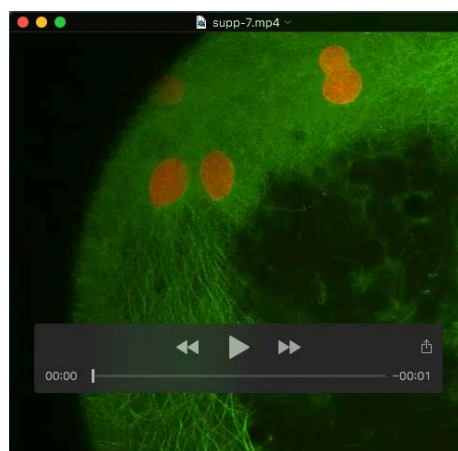

**Movie 7**

Confocal time-lapse movie of embryo expressing H2B-RFP and GFP-Dcx. Stack starts below the most superficial microtubules so that nuclei can be clearly visualized.

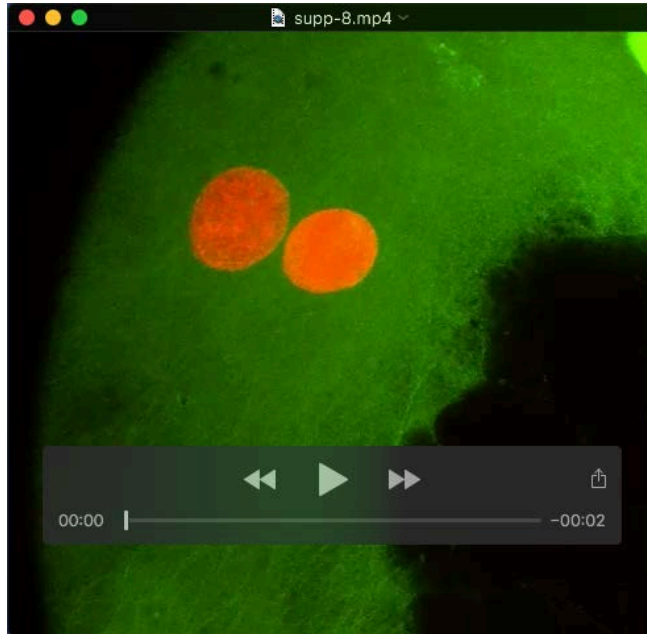

### Movie 8

Confocal time-lapse movie of embryo expressing H2B-RFP, GFP-Dcx and GFP-Klc1. e-YSN migration is significantly slowed and nuclei lack elongated fronts. Stack starts below the most superficial microtubules so that nuclei can be clearly visualized.

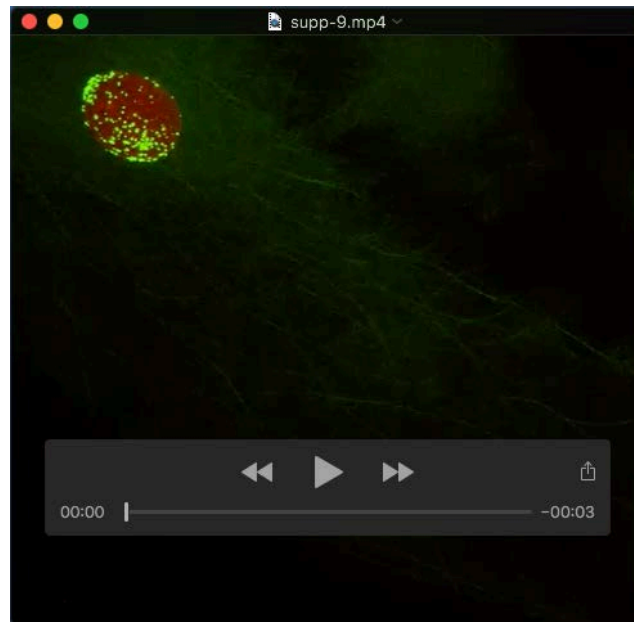

### Movie 9

Confocal time-lapse movie of embryo expressing H2B-RFP, GFP-Dcx and Citrine-DynamitinG1. Migrating e-YSN exhibits irregular movements.
